# Supplementary material for: Aptamer-conjugated Mn3O4@SiO2 core–shell nanoprobes for targeted magnetic resonance imaging
Source: Royal Society of Chemistry journal article supplement (doi:10.1039/c3nr03490a), 2013-01-01
Supplement: c3nr03490a.pdf [file c3nr03490a.pdf]

***Supporting Information for***

**Aptamer-conjugated Mn<sub>3</sub>O<sub>4</sub>@SiO<sub>2</sub> Core-Shell Nanoprobes for Targeted  
Magnetic Resonance Imaging**

He Hu<sup>a</sup>, Antao Dai<sup>a</sup>, Jin Sun<sup>a</sup>, Xiangyuan Li<sup>a</sup>, Fenghou Gao<sup>b</sup>, Lizhong Wu<sup>b</sup>, Yong Fang<sup>b\*</sup>, Hong  
Yang<sup>a</sup>, Lu An<sup>a</sup>, Huixia Wu<sup>a</sup>, Shiping Yang<sup>a\*</sup>

<sup>a</sup>The Education Ministry Key Lab of Resource Chemistry and Shanghai Key Laboratory of  
Rare Earth Functional Materials, Department of Chemistry, Shanghai Normal University,  
No.100 Guilin Road, Shanghai, 200234, China

<sup>b</sup>No. 3, People's Hospital Affiliated to Shanghai Jiao Tong University School of Medicine,  
Shanghai 201900, China

E-mail: fangyong1020@hotmail.com, [shipingy@shnu.edu.cn](mailto:shipingy@shnu.edu.cn)

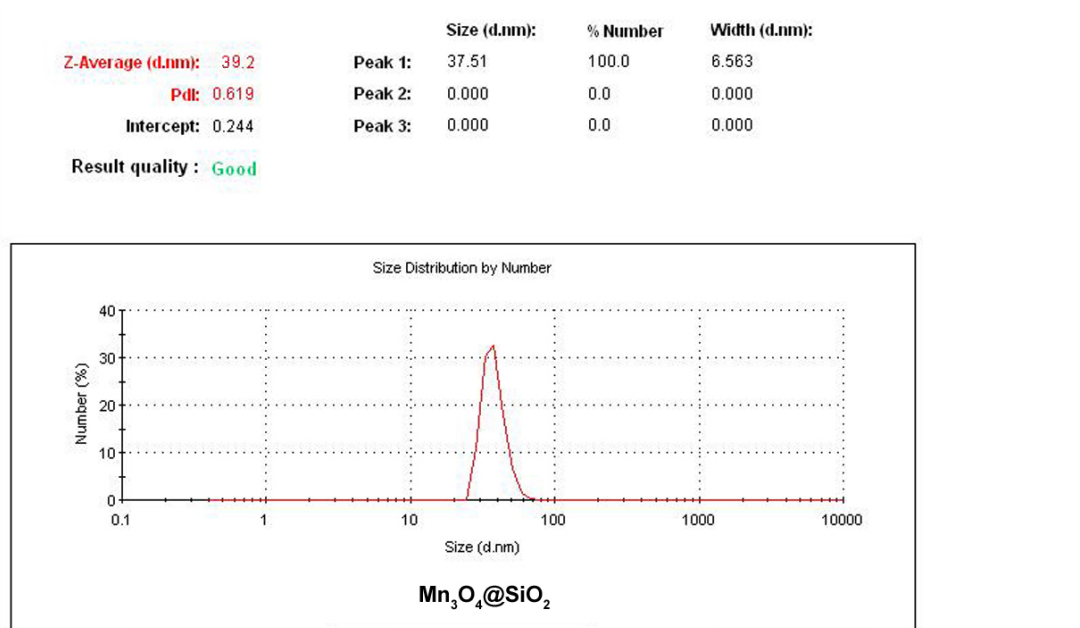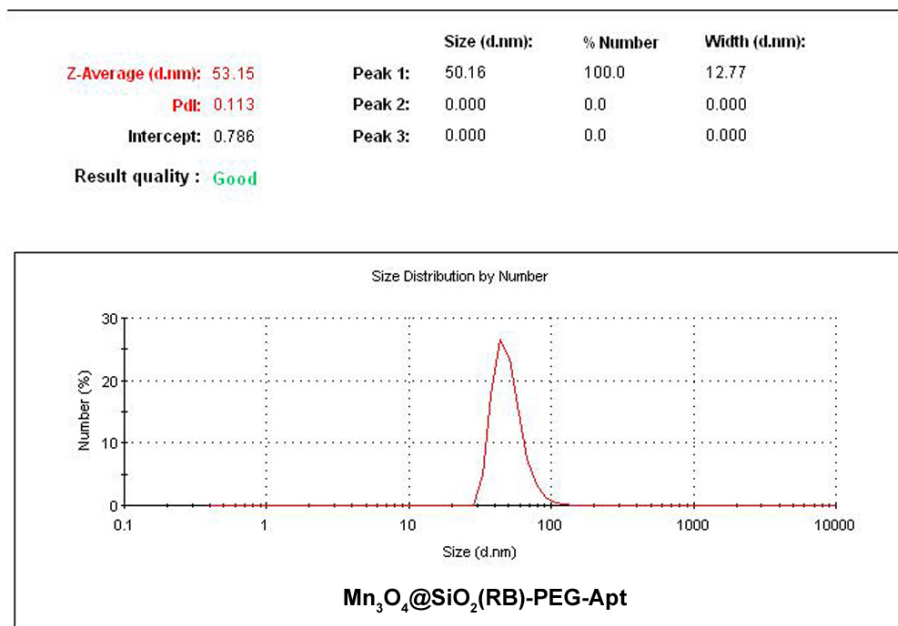

Figure S1. The effective hydrodynamic diameter of the core-shell Mn<sub>3</sub>O<sub>4</sub>@SiO<sub>2</sub> and Mn<sub>3</sub>O<sub>4</sub>@SiO<sub>2</sub>(RB)-PEG-Apt measured by dynamic light scattering (DLS).

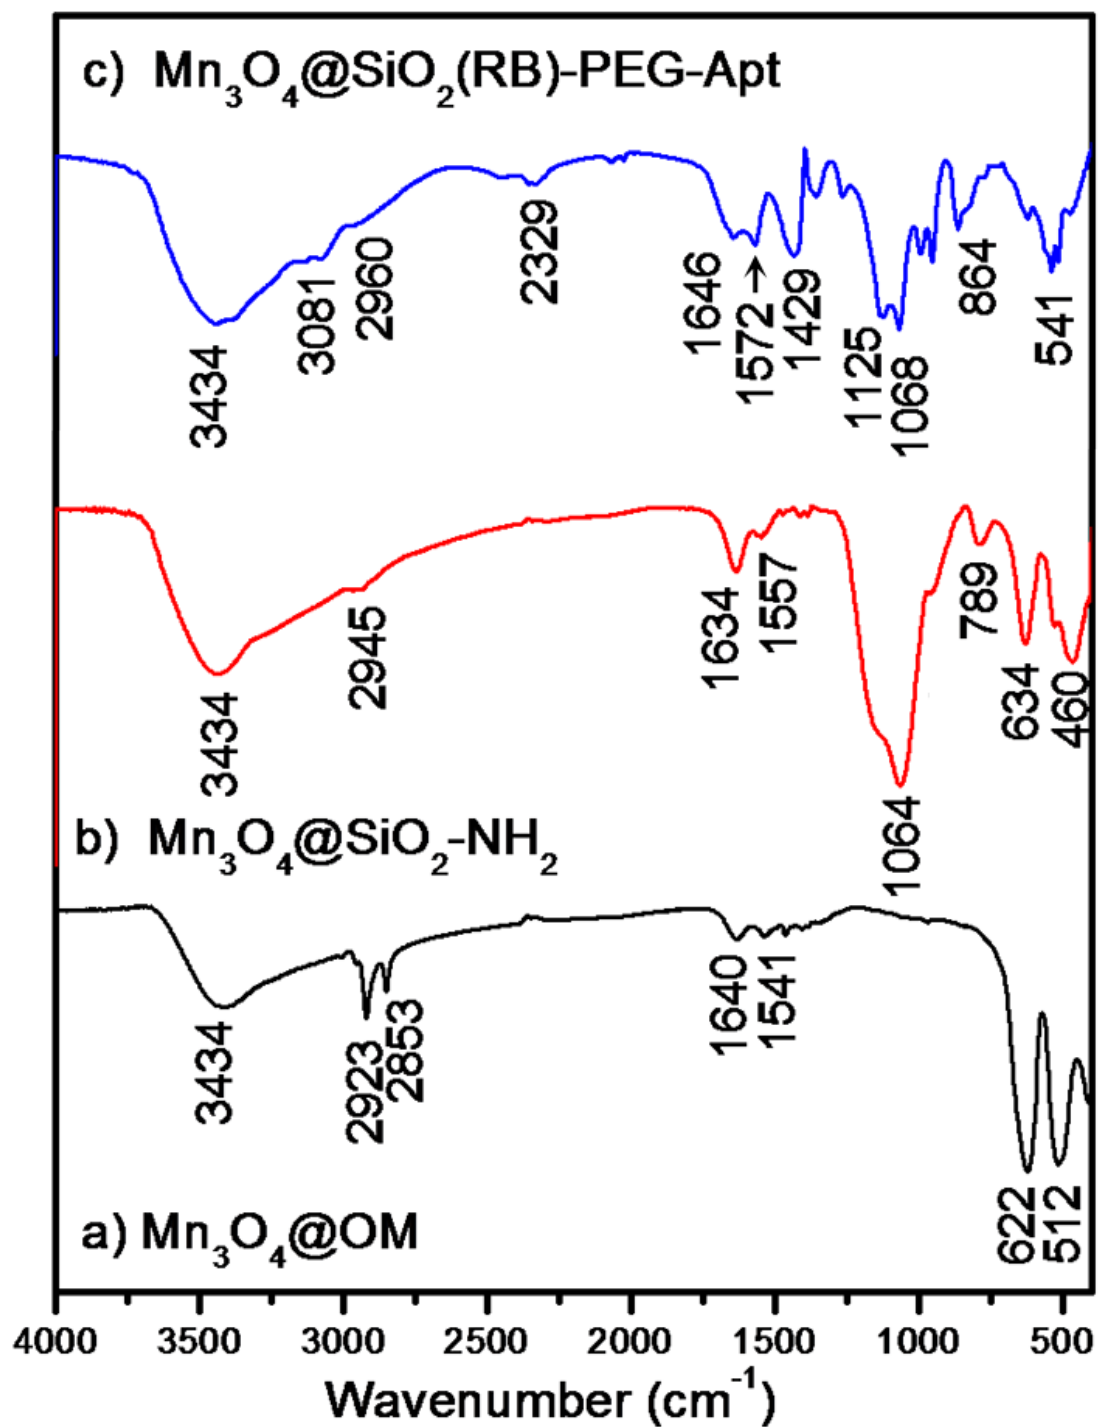

**Figure S2.** FTIR spectra of A) Mn<sub>3</sub>O<sub>4</sub> NPs, B) Mn<sub>3</sub>O<sub>4</sub>@SiO<sub>2</sub>-NH<sub>2</sub> core-shell nanocomposites and c) Mn<sub>3</sub>O<sub>4</sub>@SiO<sub>2</sub>(RB)-PEG-Apt.

The broad band at around  $\nu = 3434 \text{ cm}^{-1}$  corresponds to the  $\text{-N-H}$  and  $\text{O-H}$  stretching vibrations are observed from the as-prepared sample. As shown in Figure S2a, the peaks at  $2923$  and  $2853 \text{ cm}^{-1}$  are assigned to the asymmetric ( $\nu_{as}$ ) and symmetric ( $\nu_s$ ) stretching vibrations of methylene ( $\text{-CH}_2$ ) in the long alkyl chain of OM. The peaks at  $1640$ ,  $1541$ ,  $622$ , and  $512 \text{ cm}^{-1}$  should be attributed to the Mn-N or Mn-O absorption band. After silica coating (Figure S2b), the strong and broad band in the range of  $1230 \sim 1010 \text{ cm}^{-1}$  and a relative weak peak at  $460 \text{ cm}^{-1}$ , corresponding to the Si-O-Si asymmetric ( $\nu_{as}$ ) stretching vibration from the  $\text{SiO}_2$  matrix. The transmission bands at  $\nu = 2945$ ,  $789$ , and  $634 \text{ cm}^{-1}$  assign to the asymmetric ( $\nu_{as}$ ) and symmetric ( $\nu_s$ ) stretching vibrations of methylene ( $\text{CH}_2$ ) from the hydrolysis and condensation of  $\text{-Si-(CH}_2)_2\text{-NH}_2$  of APTES, respectively. The characteristic absorption peak at  $1634 \text{ cm}^{-1}$  can be assigned to N-H deformation vibrations. After the core-shell nanoparticle further conjugated with RBITC, PEG and Aptamer (Figure S2c), the large amount of organic ligands on the surface of the NPs resulting the stretching vibrations of methylene ( $\text{CH}_2$ ) (around  $\nu = 3081$ ,  $2960$ , and  $864 \text{ cm}^{-1}$ ) increased dramatically. the new peaks at  $\nu = 2329$ ,  $1646$ ,  $1572$  and  $1640 \text{ cm}^{-1}$  attributed to the vibration of imide-bond appear in aptamer molecular and formation between the amines and carboxylic acid of PEG. the strong and broad band in the range of  $1230 \sim 1010 \text{ cm}^{-1}$  is slightly different from the silica coated  $\text{Mn}_3\text{O}_4$  NPs is due to the overlap of the C-O-C stretching vibration from the PEG and Si-O-Si asymmetric ( $\nu_{as}$ ) stretching vibration from the  $\text{SiO}_2$  matrix.

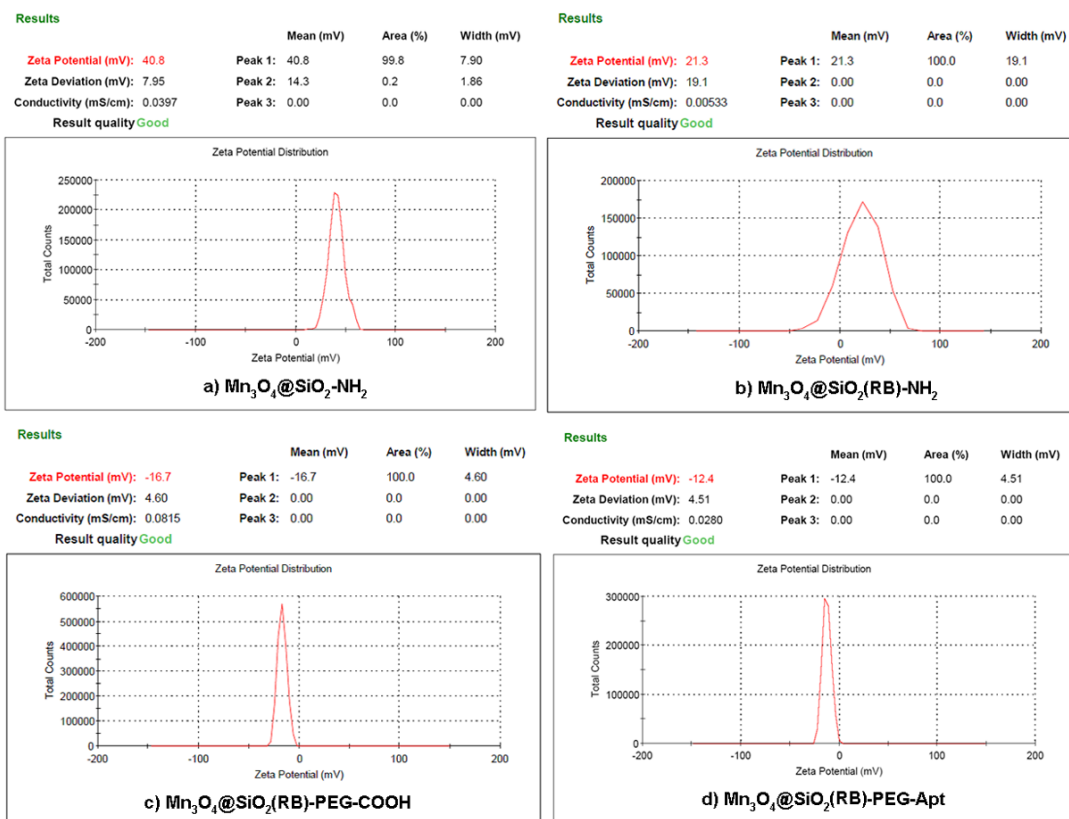

**Figure S3.** The surface zeta potential of a) Mn<sub>3</sub>O<sub>4</sub>@SiO<sub>2</sub>-NH<sub>2</sub>, b) Mn<sub>3</sub>O<sub>4</sub>@SiO<sub>2</sub>(RB)-NH<sub>2</sub>, c) Mn<sub>3</sub>O<sub>4</sub>@SiO<sub>2</sub>(RB)-PEG-COOH, d) Mn<sub>3</sub>O<sub>4</sub>@SiO<sub>2</sub>(RB)-PEG-Apt.

As well known, the surface zeta potential of pure SiO<sub>2</sub> hollow spheres was about -49 mV, while the amine-functionalized Mn<sub>3</sub>O<sub>4</sub>@SiO<sub>2</sub> core-shell nanocomposites were increased to +40.8 mV, and the value was reduced to +20.3 mV after one-third of amines conjugated with RBITC, and the value was reduced to -16.7 mV after PEG-COOH conjugated with the remaining amines. After formation of the final Mn<sub>3</sub>O<sub>4</sub>@SiO<sub>2</sub>(RB)-PEG-Apt products, the zeta potential was -12.4 mV.

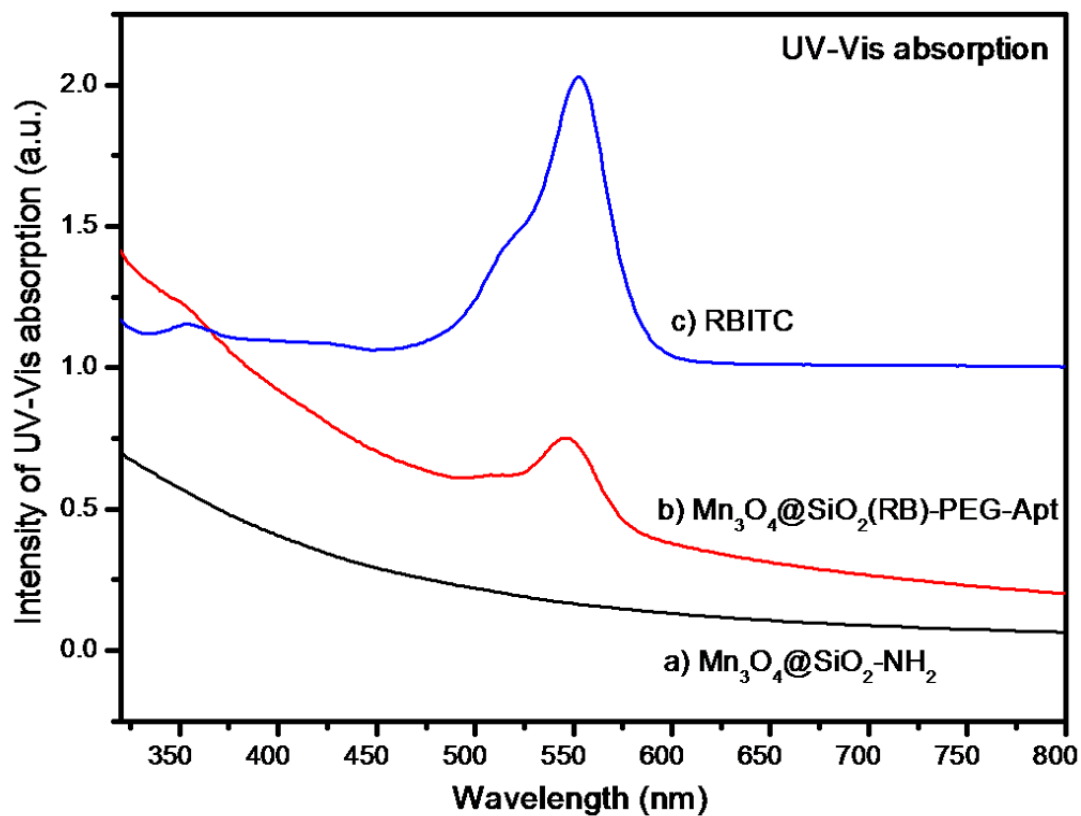

**Figure S4.** UV-vis spectra of A)  $\text{Mn}_3\text{O}_4@\text{SiO}_2\text{-NH}_2$  nanocomposites, B)  $\text{Mn}_3\text{O}_4@\text{SiO}_2(\text{RB})\text{-PEG-Apt}$  and C) pure RBITC in PBS buffer. It is clear that  $\text{Mn}_3\text{O}_4@\text{SiO}_2\text{-NH}_2$  nanocomposites do not show any prominent absorption peaks, and the characteristic bands at 550 nm correspond to the absorption of the dye Rhodamine B.

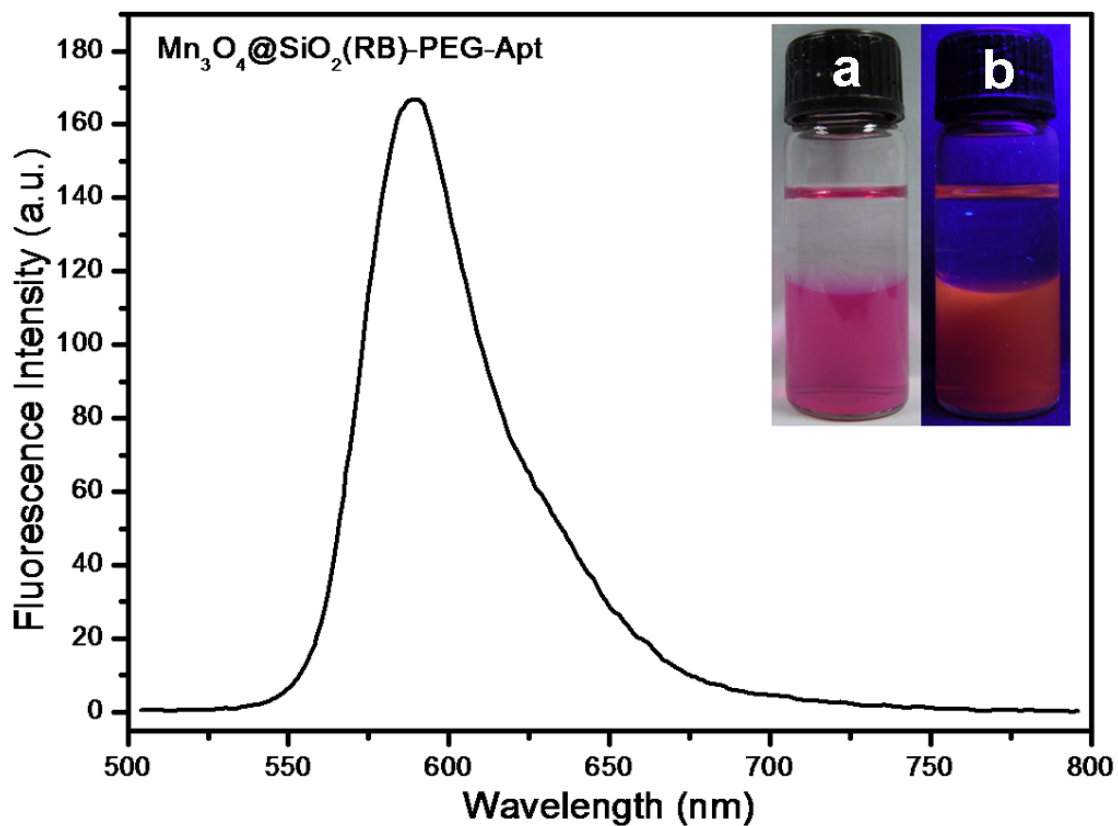

**Figure S5.** The room temperature photoluminescence (PL) spectra of  $\text{Mn}_3\text{O}_4@\text{SiO}_2(\text{RB})\text{-PEG-Apt}$  with concentration of  $100 \mu\text{g mL}^{-1}$  in aqueous excited at 488 nm. Insets: visual photographs of  $\text{Mn}_3\text{O}_4@\text{SiO}_2(\text{RB})\text{-PEG-Apt}$  nanocomposites in a) PBS at the bottom (hexane at the upper layer), and the b) red emission of Rhodamine B under the 365nm portable UV lamp excitation.

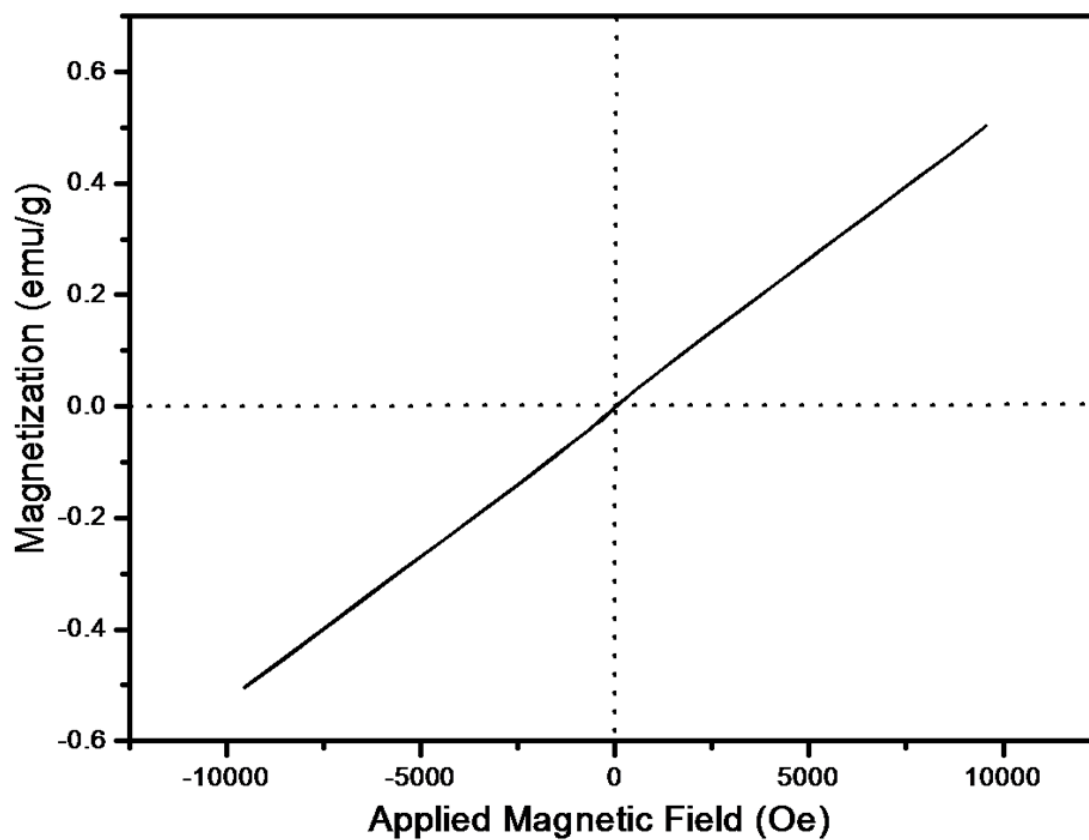

**Figure S6.** Hysteresis loops of  $\text{Mn}_3\text{O}_4@\text{SiO}_2(\text{RB})\text{-NH}_2$  NPs at  $T = 300$  k. They were paramagnetic at room temperature.



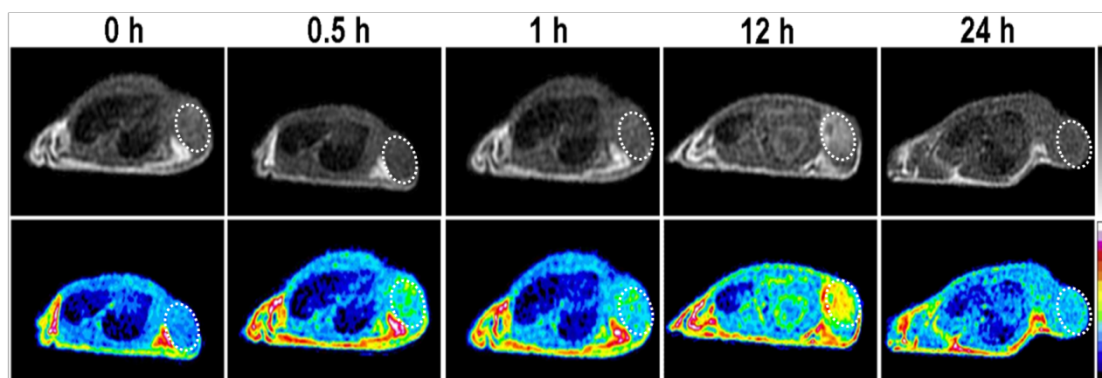

**Figure S7.** The target group of  $T_1$ -weight MR images of a tumor bearing mouse model (inoculated with HeLa cells) injected with  $\text{Mn}_3\text{O}_4@\text{SiO}_2(\text{RB})\text{-PEG-Apt}$  NPs, obtained at pre, 0.5, 1, 12, and 24 h post-injection. The upper panel shows the black and white images, the bottom panel shows the colored images (the color bar changing from black to white indicates the gradual increase in MR signal intensity).

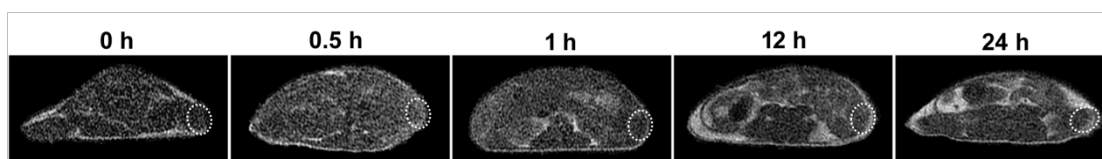

**Figure S8.** The control group of  $T_1$ -weight MR images of a tumor bearing mouse model (inoculated with HeLa cells) injected with  $\text{Mn}_3\text{O}_4@\text{SiO}_2(\text{RB})\text{-PEG}$  NPs, obtained at pre, 0.5, 1, 12, and 24 h post-injection. There were nearly no contrast enhancement in tumor throughout the observation time.
